# Supplementary material for: Pharmacokinetics of Sofosbuvir/Velpatasvir and efficacy of an alternate‐day treatment in hemodialysis patients with chronic hepatitis C infection
Source: PubMed Central journal article supplement — Clin Transl Sci. 2024 Jul 14;17(7):e13884. doi: 10.1111/cts.13884 (PMC11246974; doi:10.1111/cts.13884), 2024-07-14

## Supplementary

### **Pharmacokinetics of Sofosbuvir/Velpatasvir and efficacy of an alternate day treatment in hemodialysis patients with chronic hepatitis C infection**

Pajaree Chariyavilaskul<sup>1,2</sup>, Nantaporn Prompila<sup>1,3</sup>, Supeecha Wittayalertpanya<sup>1,2,3</sup>, Sookruethai Lekhyananda<sup>4</sup>, Wisit Prasithsirikul<sup>5</sup>, Thananda Trakarnvanich<sup>6</sup>, Somboon Jeenapongsa<sup>7</sup>, Paweena Susantitaphong<sup>8,9</sup>, Stephen Kerr<sup>10</sup>, Anchalee Avihingsanon<sup>11</sup>, Pisit Tangkitwanich<sup>12</sup>, Kearkiat Praditpornsilpa<sup>8,\*</sup>

<sup>1</sup>Center of Excellence in Clinical Pharmacokinetics and Pharmacogenomics, Faculty of Medicine, Chulalongkorn University, Bangkok, Thailand.

<sup>2</sup>Department of Pharmacology, Faculty of Medicine, Chulalongkorn University, Bangkok, Thailand.

<sup>3</sup>Chula Pharmacokinetic Research Center, Faculty of Medicine, Chulalongkorn University, Bangkok, Thailand.

<sup>4</sup>The Kidney Foundation of Thailand, Bangkok, Thailand.

<sup>5</sup>Bamrasnaradura Infectious Institute, Department of Disease Control, Ministry of Public Health, Thailand.

<sup>6</sup>Faculty of Medicine, Vajira Hospital, Navamindradhiraj University, Bangkok, Thailand.

<sup>7</sup>Phichit Hospital, Ministry of Public Health, Phicit, Thailand.

<sup>8</sup>Division of Nephrology, Department of Medicine, Faculty of Medicine, Chulalongkorn University, Bangkok, Thailand.

<sup>9</sup>Center of Excellence for Metabolic Bone Disease in CKD Patients, Faculty of Medicine, Chulalongkorn University, Bangkok, Thailand.

<sup>10</sup>Biostatistics Excellence Center, Faculty of Medicine, Chulalongkorn University, Bangkok, Thailand.

<sup>11</sup>The HIV Netherlands Australia Thailand Research Collaboration (HIV-NAT), Thai Red Cross AIDS Research Center, Bangkok, Thailand.

<sup>12</sup>Department of Biochemistry, Faculty of Medicine, Chulalongkorn University, Bangkok, Thailand.

**\*Correspondence**

Kearkiat Praditpornsilpa

Department of Medicine, Faculty of Medicine, Chulalongkorn University, Bangkok, Thailand

Email: kearkiat@hotmail.com

**Table S1 LLOQ and accuracy and precision. For plasma**

| Analytes    |                      | Intra-batch |        | Inter-batch |       |
|-------------|----------------------|-------------|--------|-------------|-------|
|             |                      | %Accuracy   | %CV    | %Accuracy   | %CV   |
| Sofosbuvir  | LLOQ (0.202 ng/ml)   | 113.168     | 9.721  | 103.234     | 9.407 |
|             | LQC (0.606 ng/ml)    | 100.891     | 10.416 | 105.479     | 3.784 |
|             | MQC (1514.801 ng/ml) | 92.250      | 7.218  | 98.983      | 5.936 |
|             | HQC (3029.602 ng/ml) | 90.788      | 0.569  | 99.568      | 8.008 |
| GS-331007   | LLOQ (10.110 ng/ml)  | 94.991      | 8.454  | 101.475     | 5.593 |
|             | LQC (30.059 ng/ml)   | 99.409      | 2.646  | 96.671      | 2.459 |
|             | MQC (1001.954 ng/ml) | 99.415      | 2.443  | 98.668      | 1.013 |
|             | HQC (2504.884 ng/ml) | 93.315      | 0.665  | 10.256      | 7.206 |
| Velpatasvir | LLOQ (2.513 ng/ml)   | 100.390     | 4.295  | 97.676      | 3.307 |
|             | LQC (7.536 ng/ml)    | 98.792      | 3.864  | 97.504      | 2.178 |
|             | MQC (609.185 ng/ml)  | 92.932      | 2.205  | 97.982      | 4.511 |
|             | HQC (1218.370 ng/ml) | 107.074     | 1.034  | 103.308     | 3.436 |

**For dialysate**

| Analytes    |                     | Intra-batch |       | Inter-batch |       |
|-------------|---------------------|-------------|-------|-------------|-------|
|             |                     | %Accuracy   | %CV   | %Accuracy   | %CV   |
| Sofosbuvir  | LLOQ (0.203 ng/ml)  | 97.635      | 7.094 | 102.003     | 5.320 |
|             | LQC (0.605 ng/ml)   | 95.339      | 8.216 | 97.928      | 2.569 |
|             | MQC (406.553 ng/ml) | 101.584     | 2.638 | 98.796      | 3.256 |
|             | HQC (813.106 ng/ml) | 97.881      | 2.520 | 98.221      | 0.395 |
| GS-331007   | LLOQ (9.995 ng/ml)  | 100.804     | 2.838 | 106.777     | 5.341 |
|             | LQC (29.777 ng/ml)  | 92.236      | 2.472 | 93.050      | 0.819 |
|             | MQC (402.391 ng/ml) | 102.548     | 4.114 | 98.701      | 3.392 |
|             | HQC (804.782 ng/ml) | 100.957     | 2.253 | 99.675      | 2.989 |
| Velpatasvir | LLOQ (3.057 ng/ml)  | 97.743      | 5.700 | 95.656      | 5.701 |
|             | LQC (9.161 ng/ml)   | 99.985      | 5.700 | 98.205      | 4.565 |
|             | MQC (78.750 ng/ml)  | 97.639      | 5.630 | 97.328      | 2.088 |
|             | HQC (157.500 ng/ml) | 90.984      | 2.362 | 93.147      | 4.698 |

**Table S2 Post-preparative stability for plasma (autosampler stability).**

| <b>Analytes</b> | <b>Concentrations</b> | <b>%Deviation</b> |
|-----------------|-----------------------|-------------------|
| Sofosbuvir      | LQC (0.606 ng/ml)     | -5.455            |
|                 | HQC (3029.602 ng/ml)  | +0.002            |
| GS-331007       | LQC (30.059 ng/ml)    | +4.026            |
|                 | HQC (2504.884 ng/ml)  | +8.594            |
| Velpatasvir     | LQC (7.536 ng/ml)     | -0.738            |
|                 | HQC (1218.370 ng/ml)  | -0.391            |

**Table S3 %Recovery for plasma.**

| <b>Analytes</b> | <b>Concentrations</b> | <b>%Recovery</b> |
|-----------------|-----------------------|------------------|
| Sofosbuvir      | LQC (0.606 ng/ml)     | 88.225           |
|                 | HQC (3029.602 ng/ml)  | 95.580           |
| GS-331007       | LQC (30.059 ng/ml)    | 58.996           |
|                 | HQC (2504.884 ng/ml)  | 57.952           |
| Velpatasvir     | LQC (7.536 ng/ml)     | 73.389           |
|                 | HQC (1218.370 ng/ml)  | 75.111           |

Figure S1 Individual's plasma sofosbuvir concentrations between dialysis and non-dialysis sessions.

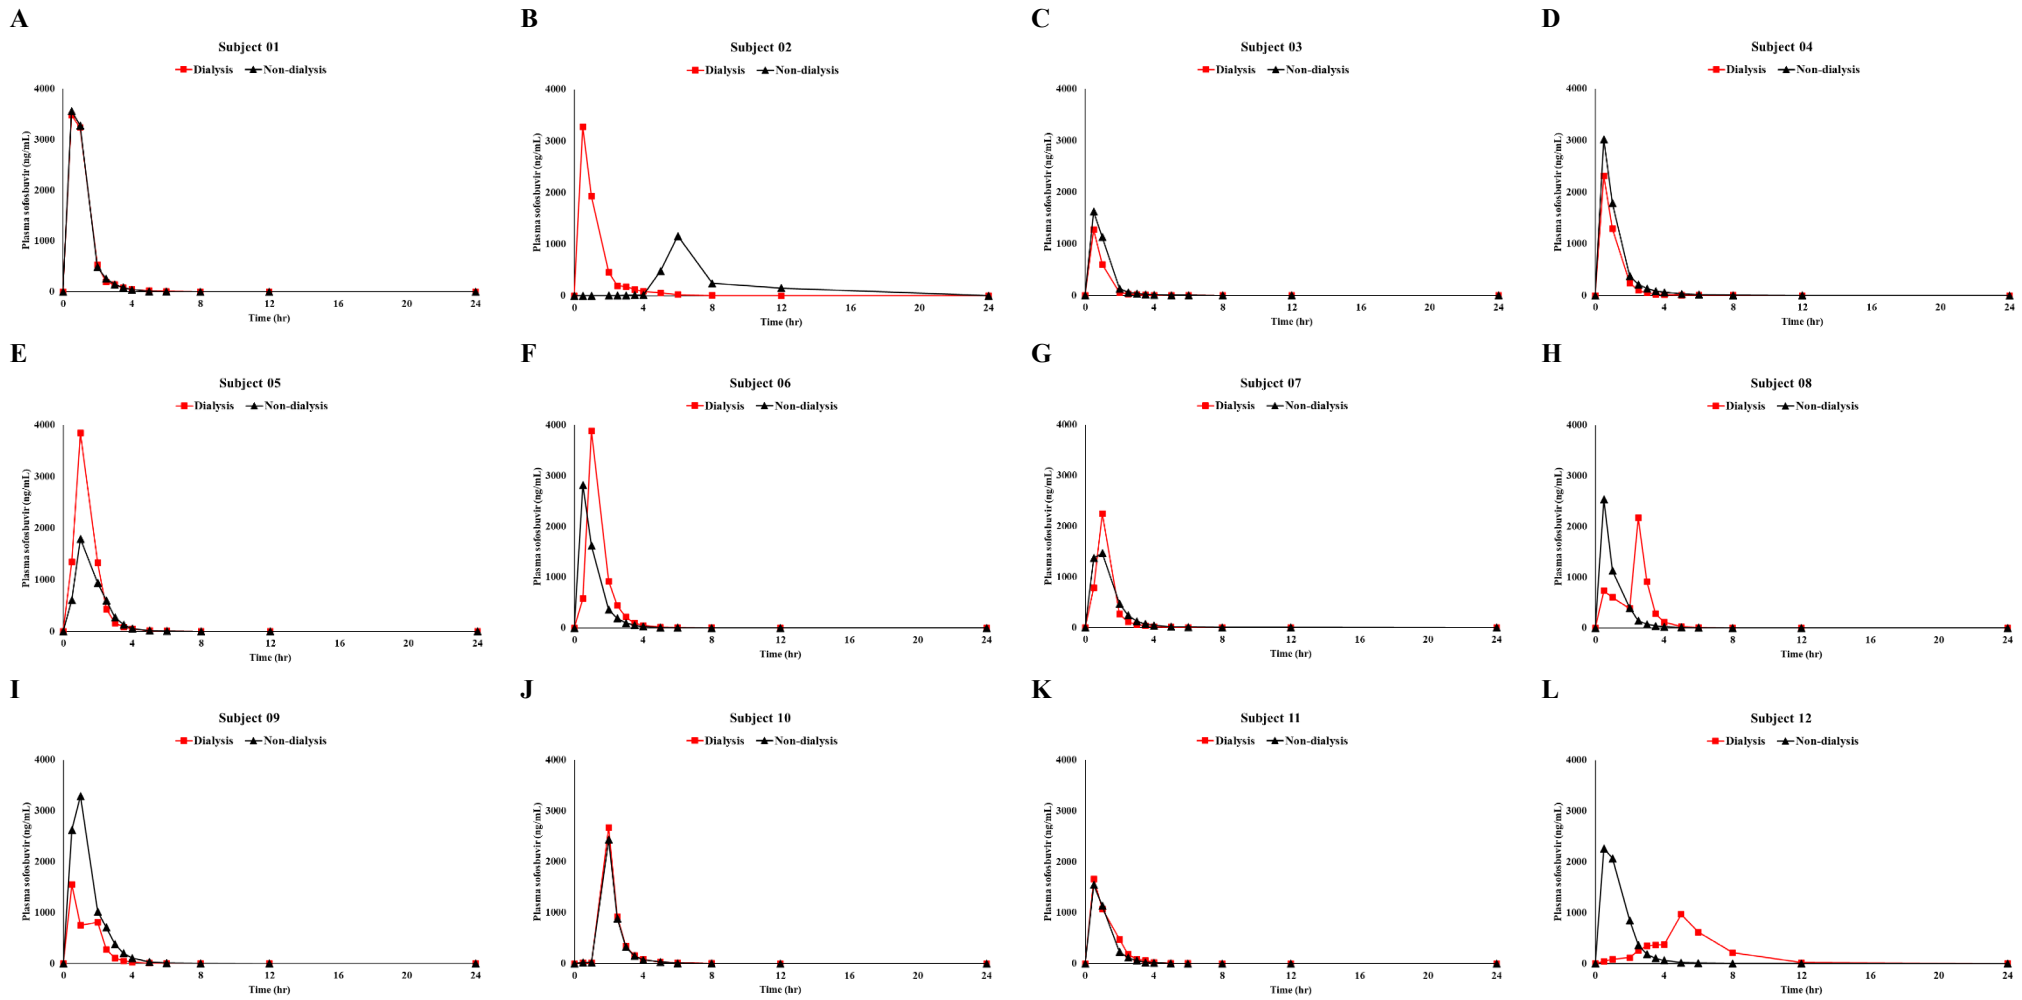

Figure S2 Individual's plasma GS-331007 concentrations between dialysis and non-dialysis sessions.

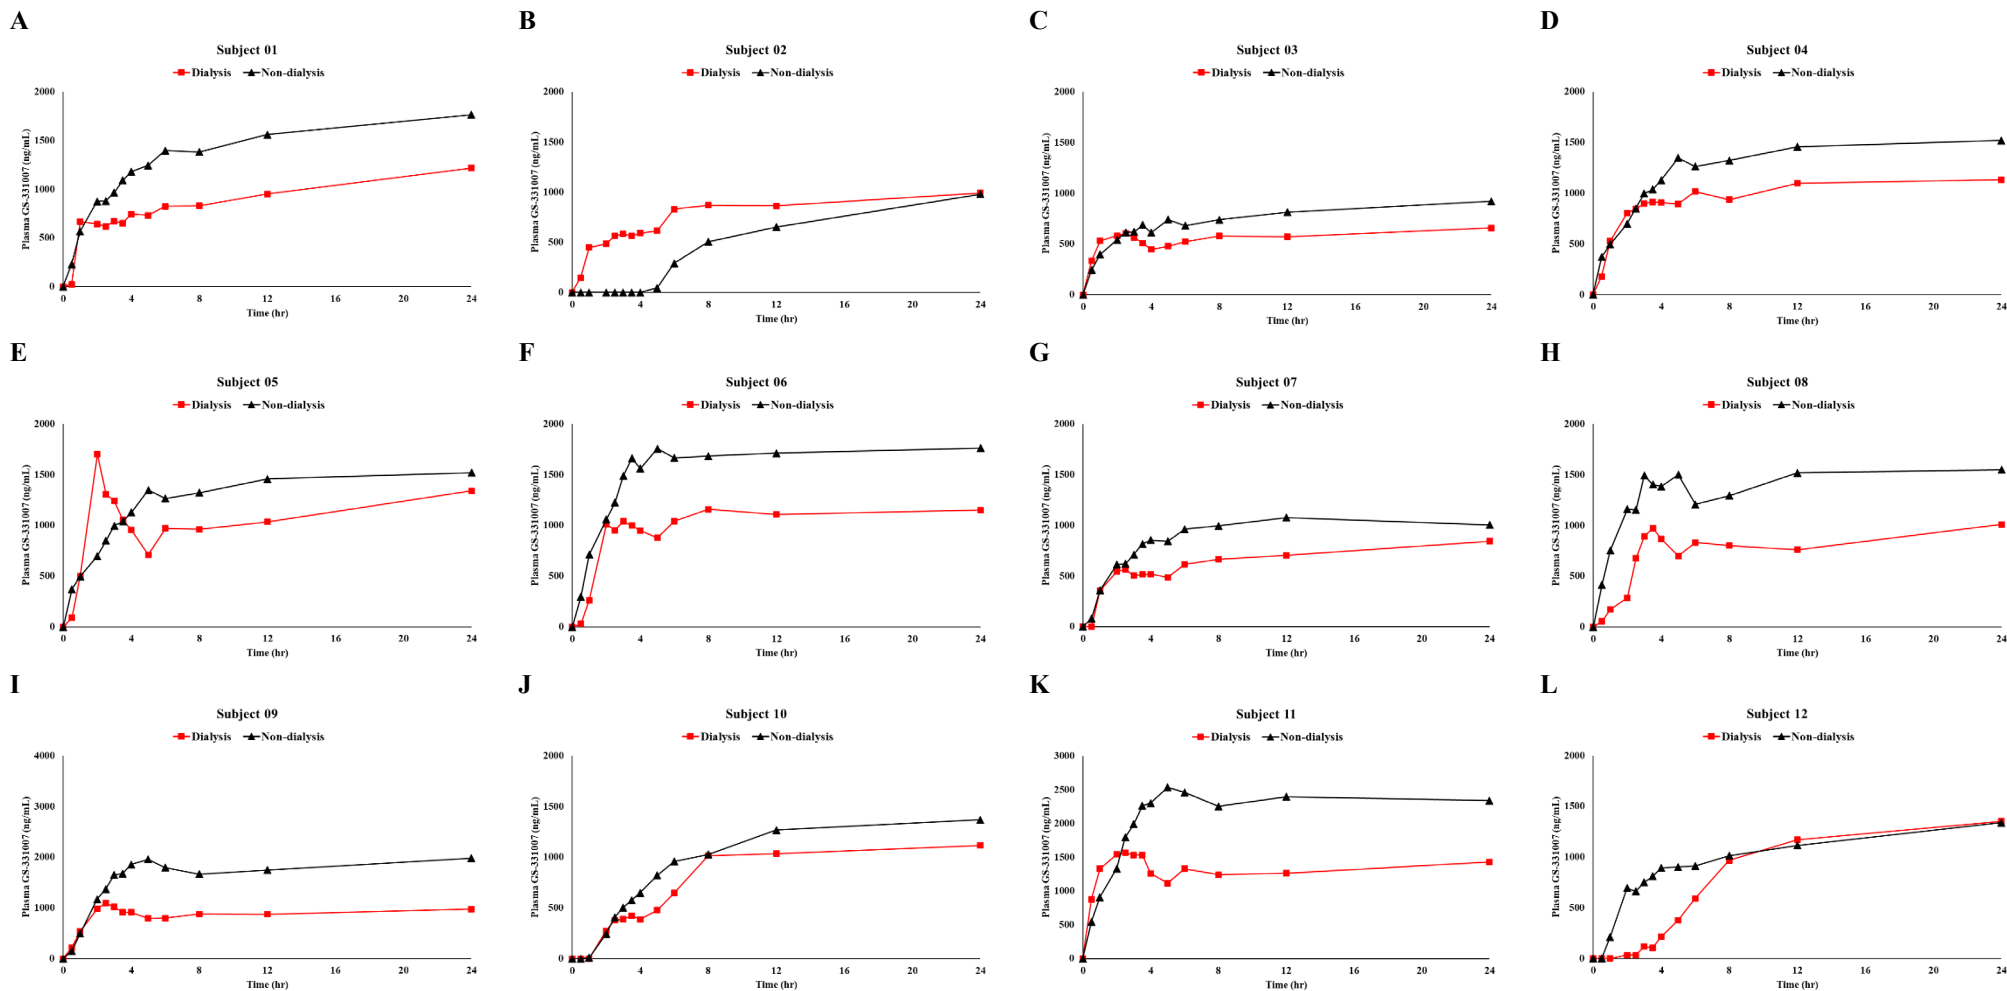

Figure S3 Individual's plasma velpatasvir concentrations between dialysis and non-dialysis sessions.

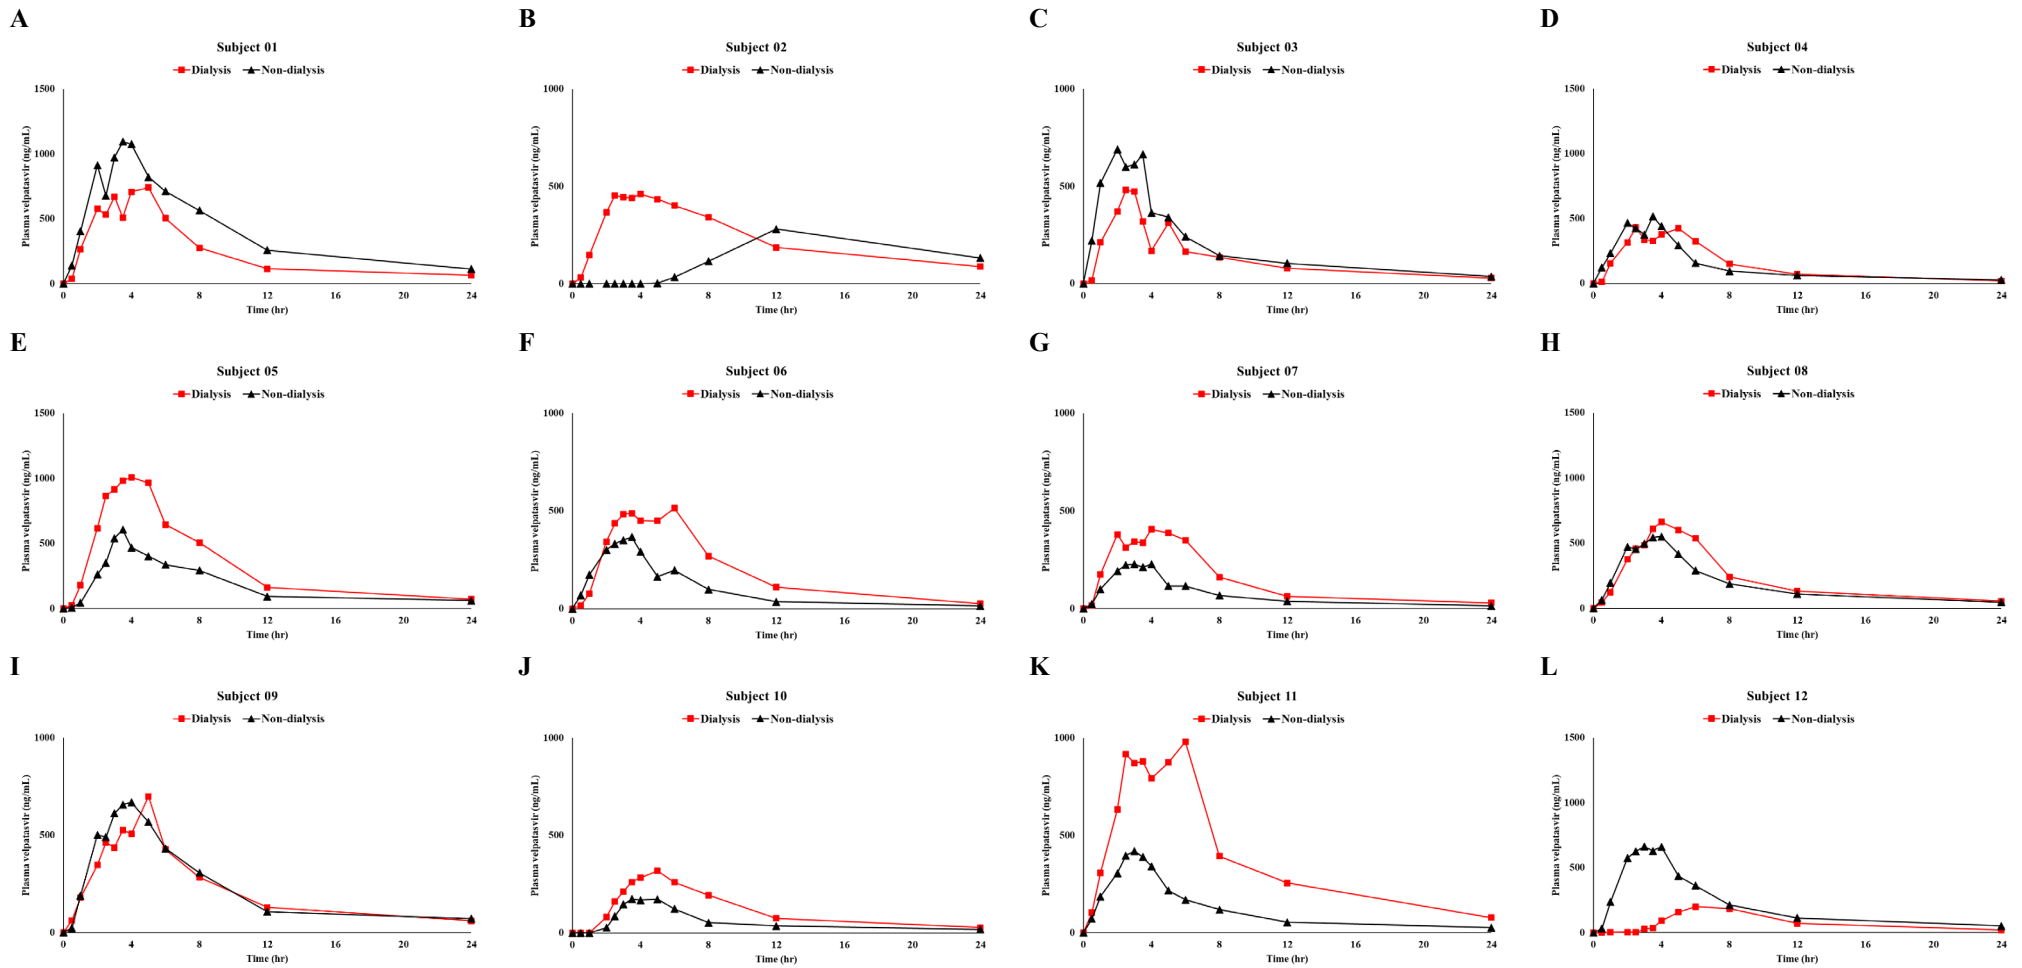

Supplement: CTS-17-e13884-s001.pdf [file CTS-17-e13884-s001.pdf]
